# Supplementary material for: ERK5 signalling in prostate cancer promotes an invasive phenotype
Source: PubMed Central journal article supplement (PMC3049582; doi:10.1038/sj.bjc.6606062), 2011-01-25
Supplement: 6606062x1.pdf [file 6606062x1.pdf]

| <b>MMP (Full Media)</b> | <b>Direction of Change on Induction of MEK5</b> | <b>Fold Change in mRNA Expression on Induction</b> |
|-------------------------|-------------------------------------------------|----------------------------------------------------|
| MMP1                    | No Change                                       |                                                    |
| <b>MMP2</b>             | ↑                                               | x 1.8                                              |
| MMP3                    | N/D                                             |                                                    |
| MMP7                    | No Change                                       |                                                    |
| <b>MMP9</b>             | ↑                                               | x 2.1                                              |
| MMP10                   | No Change                                       |                                                    |
| MMP11                   | No Change                                       |                                                    |
| <b>MMP12</b>            | ↑                                               | x 2.7                                              |
| MMP13                   | No Change                                       |                                                    |
| MMP14                   | No Change                                       |                                                    |
| MMP15                   | No Change                                       |                                                    |
| <b>MMP16</b>            | ↓                                               | - x 1.67                                           |
| MMP17                   | No Change                                       |                                                    |
| MMP19                   | -                                               |                                                    |
| MMP20                   | -                                               |                                                    |
| MMP21                   | No Change                                       |                                                    |
| MMP22                   | No Change                                       |                                                    |
| MMP23                   | No Change                                       |                                                    |
| MMP24                   | No Change                                       |                                                    |
| MMP25                   | No Change                                       |                                                    |
| MMP26                   | -                                               |                                                    |
| MMP27                   | No Change                                       |                                                    |
| MMP28                   | No Change                                       |                                                    |
| TIMP1                   | No Change                                       |                                                    |
| <b>TIMP2</b>            | ↑                                               | x 2.2                                              |
| TIMP3                   | No Change                                       |                                                    |
| TIMP4                   | N/D                                             |                                                    |

**Supplementary table: Summary of expression profiling of MMP genes in response to activation of MEK5-ERK5 pathway** The fold change (increase or decrease) in the means between the uninduced and induced groups were calculated and summarised with a fold increase or decrease of  $\geq x1.5$  was considered significant. Arrows in the middle column illustrate direction of change in gene expression with overexpression of MEK5. N/D = not detected. The values given are derived from TaqMan expression data after normalisation to 18SrRNA levels, and are probe, and therefore gene-specific.

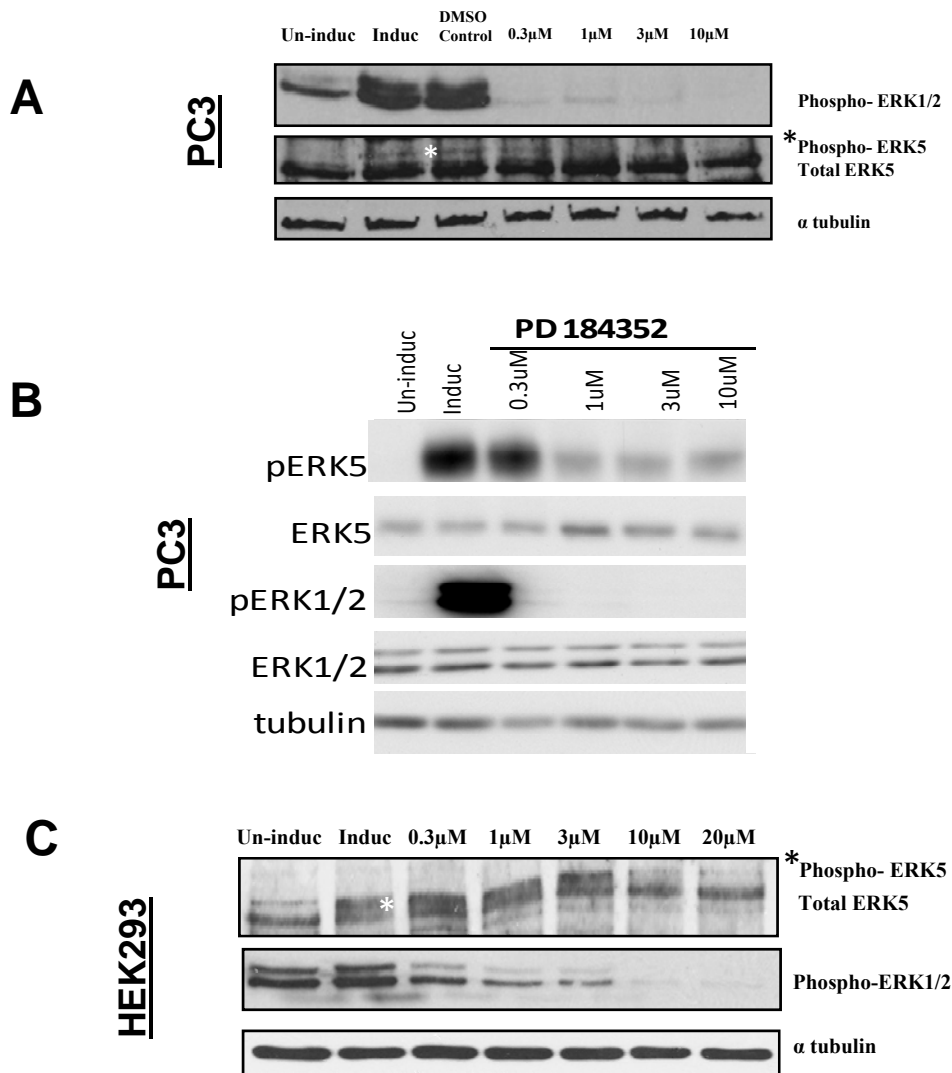

## Supplementary figure 1.

Western blots showing differential blockade of ERK1/2 and ERK5 by PD184352 in PC3 and HEK293 stably transfected with MEK5(D) cells.

- (A) Validation western blots show differential blockade of ERK1/2 activation alone at lower dose PD184352 (0.3  $\mu$ M), and blockade of ERK1/2 and ERK5 at higher dose of PD184352 (3  $\mu$ M) in PC3 cells stimulated with EGF (100 ng/ml)(\* signifies band shift associated with phosphor-ERK5).
- (B) Similarly, status of ERK5 upon EGF stimulation in the presence of increasing doses of PD184352 was illustrated using specific pERK5 antibody.
- (C) Western blot showing differential blockade of ERK1/2 activation alone at lower dose PD184352 (1  $\mu$ M), and blockade of ERK1/2 and ERK5 at higher dose of PD184352 (10  $\mu$ M) in MEK5(D) over-expressing HEK293 cell line.

## PC3

### Euclidean Distance

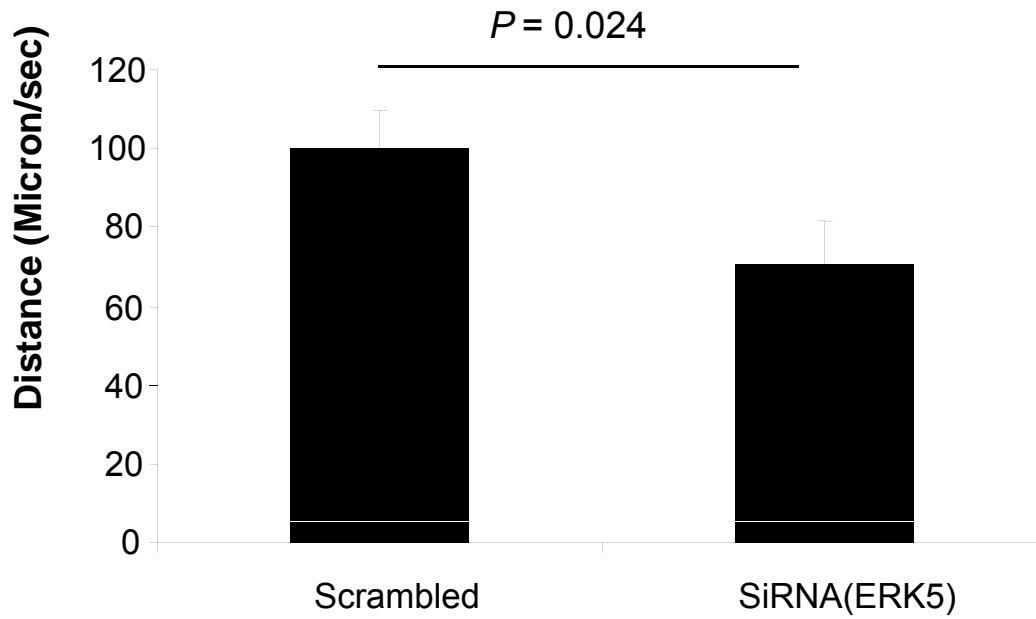

### Supplementary figure 2.

siRNA mediated knockdown of ERK5 expression in PC3 resulted in reduced euclidean distance travelled.

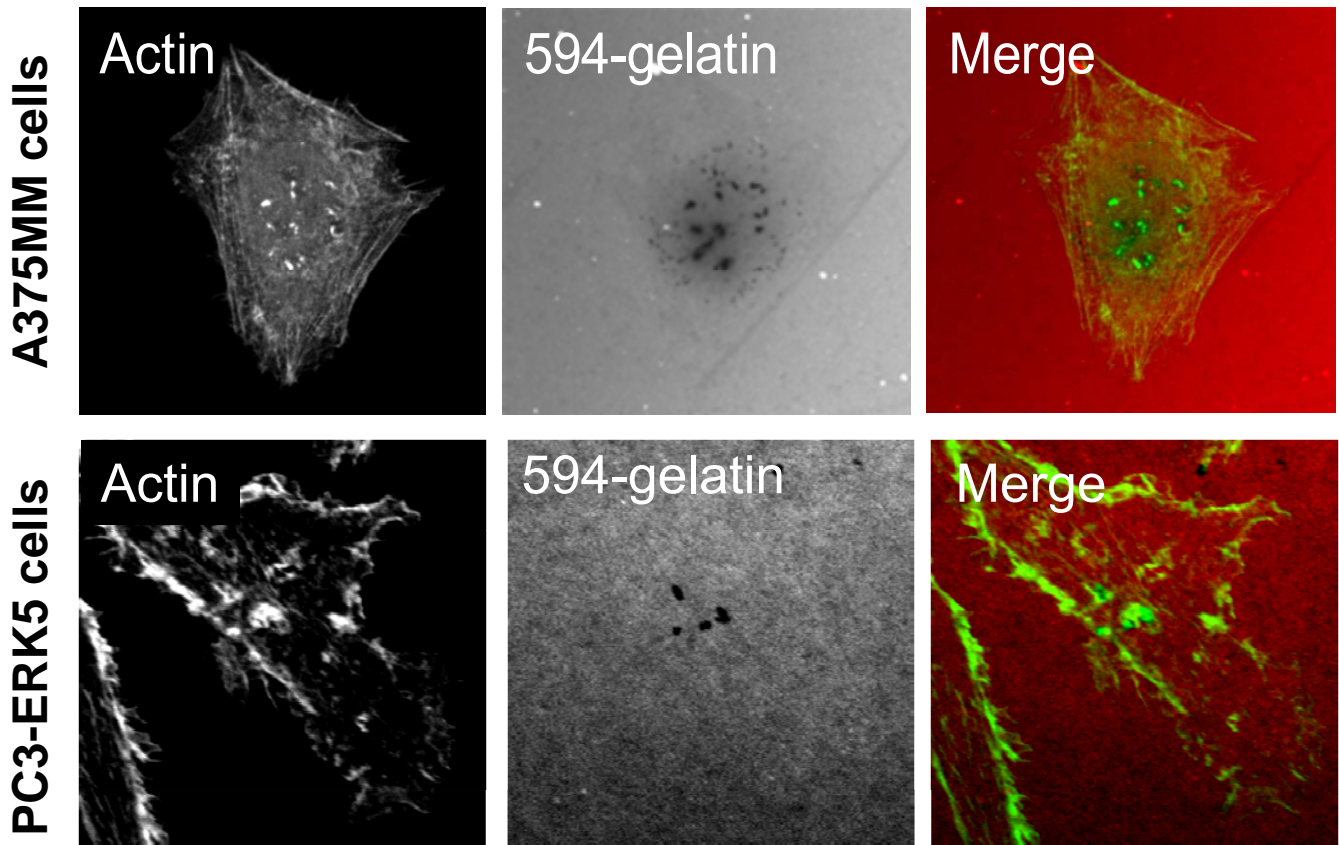

### **Supplementary figure 3. Invadopodia in A375 melanoma and PC3-ERK5 cells.**

A375 or PC3-ERK5 cells were seeded on glass cover slips crossed-linked with 594-gelatin, and leave for 16 hours to allow gelatin degradation. Cells were fixed and stain with 488 phalloidin. Confocal images show actin localization at invadopodia where gelatin degradation occurs.
